# Supplementary material
Source: PubMed Central journal article supplement (PMC2709068)

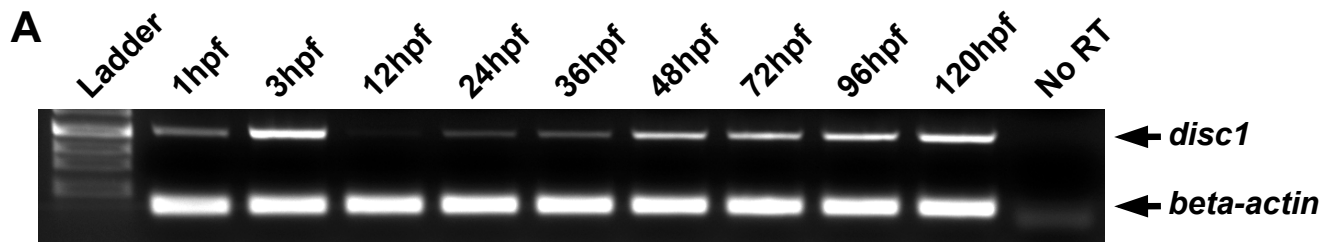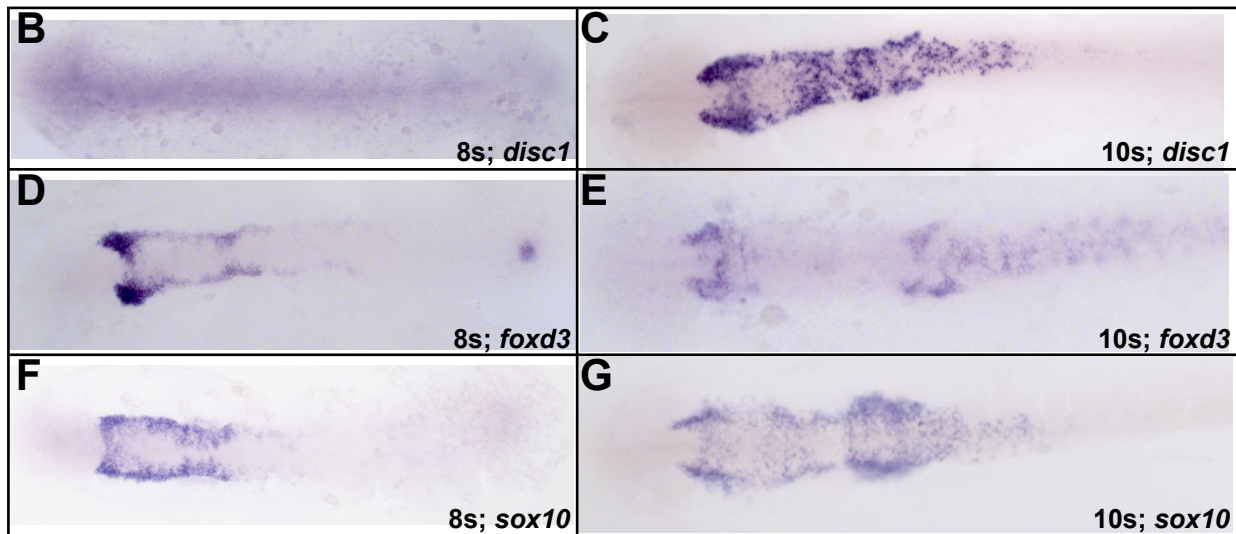

Supplement: supp_136_15_2623__1.pdf [file supp_136_15_2623__1.pdf]

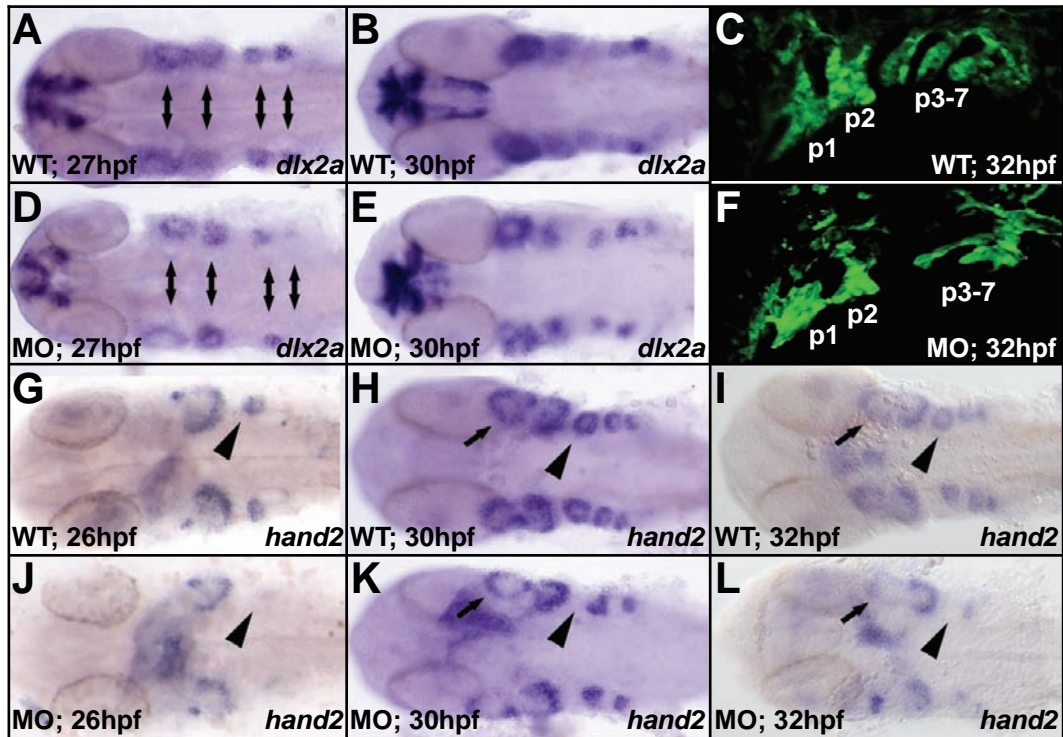

Supplement: supp_136_15_2623__2.pdf [file supp_136_15_2623__2.pdf]

**A**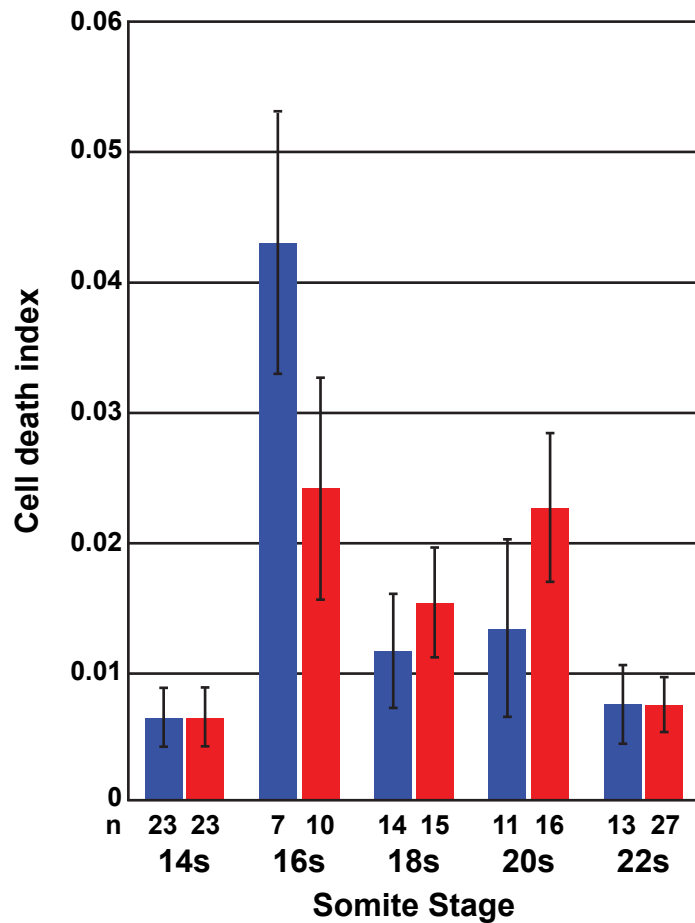**B**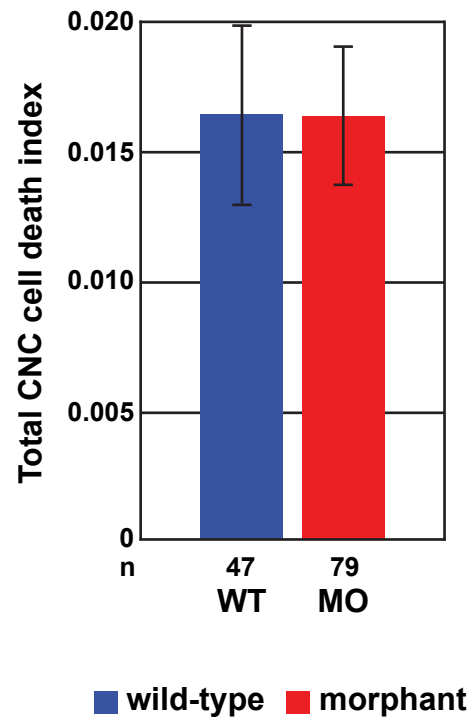

Supplement: supp_136_15_2623__5.pdf [file supp_136_15_2623__5.pdf]
